# Supplementary figures and images for: Lifestyle score is associated with cellular immune profiles in healthy Tanzanian adults
Source: PubMed Central journal article supplement — Brain Behav Immun Health. 2024 Sep 20;41:100863. doi: 10.1016/j.bbih.2024.100863 (PMC11470418; doi:10.1016/j.bbih.2024.100863), 2024-09-20

**Figure S1**

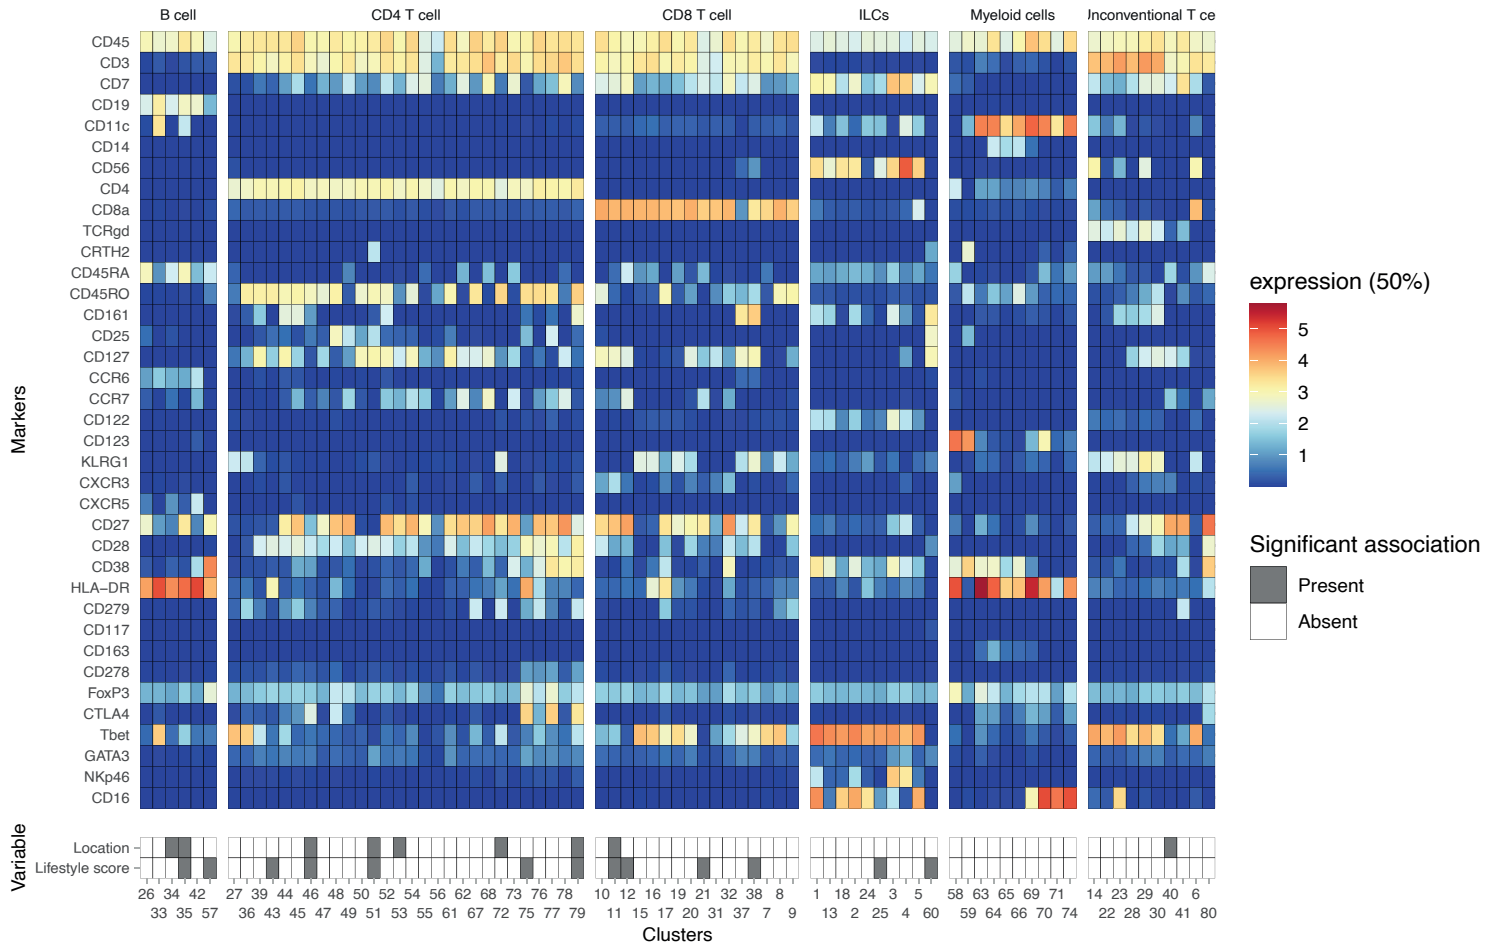

Figure S2

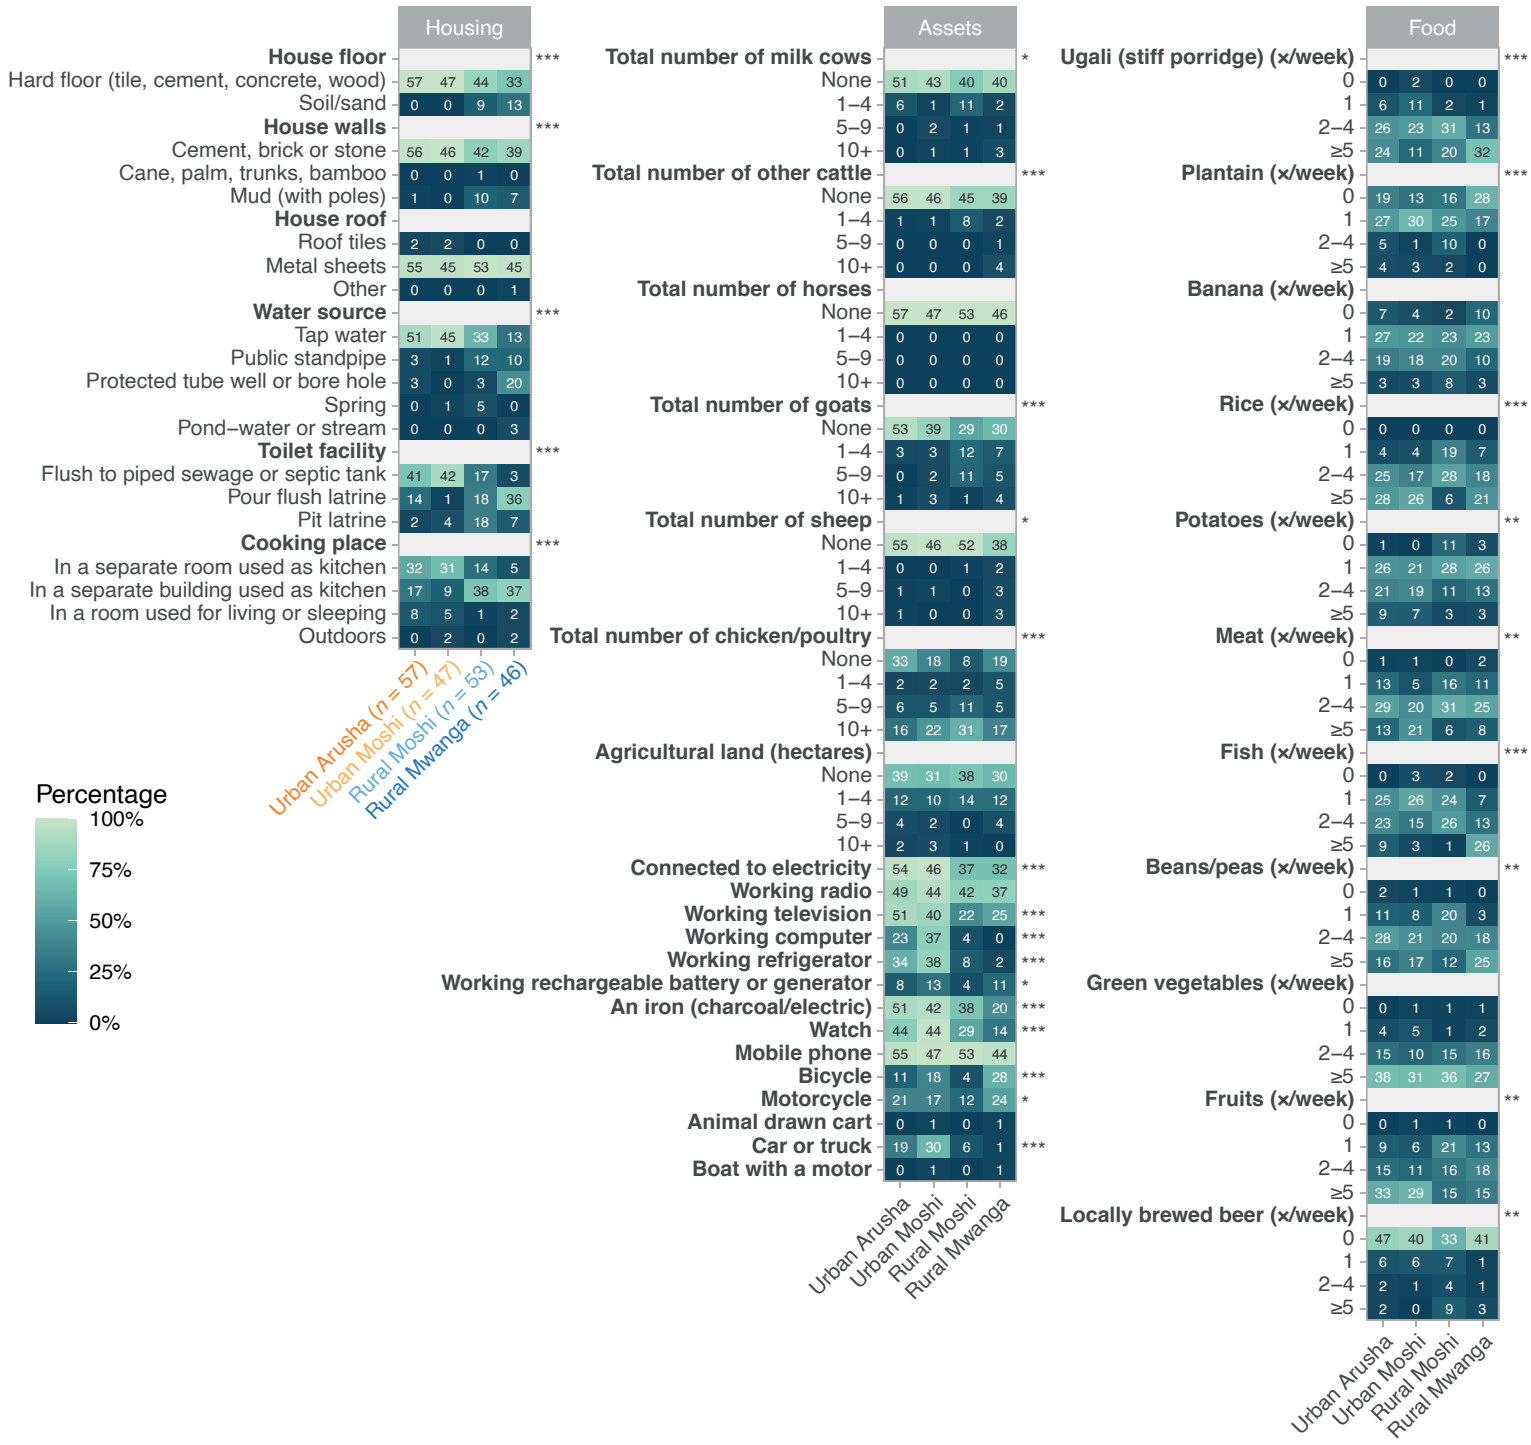

Figure S3

**A**

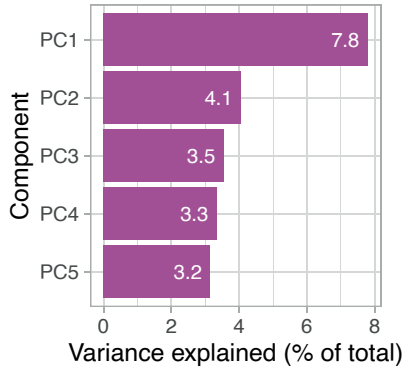

**B**

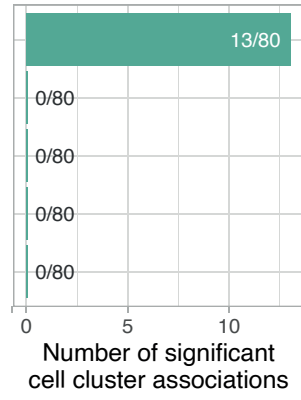

**C**

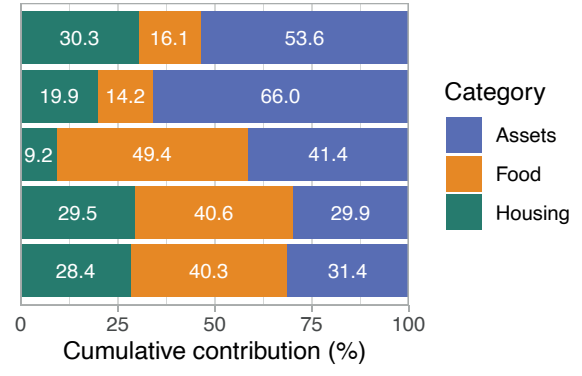

**Figure S4**

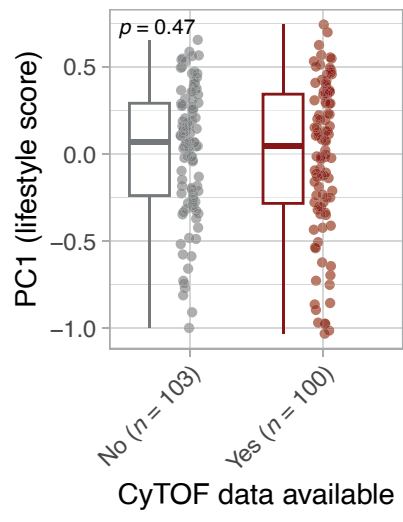

Figure S5

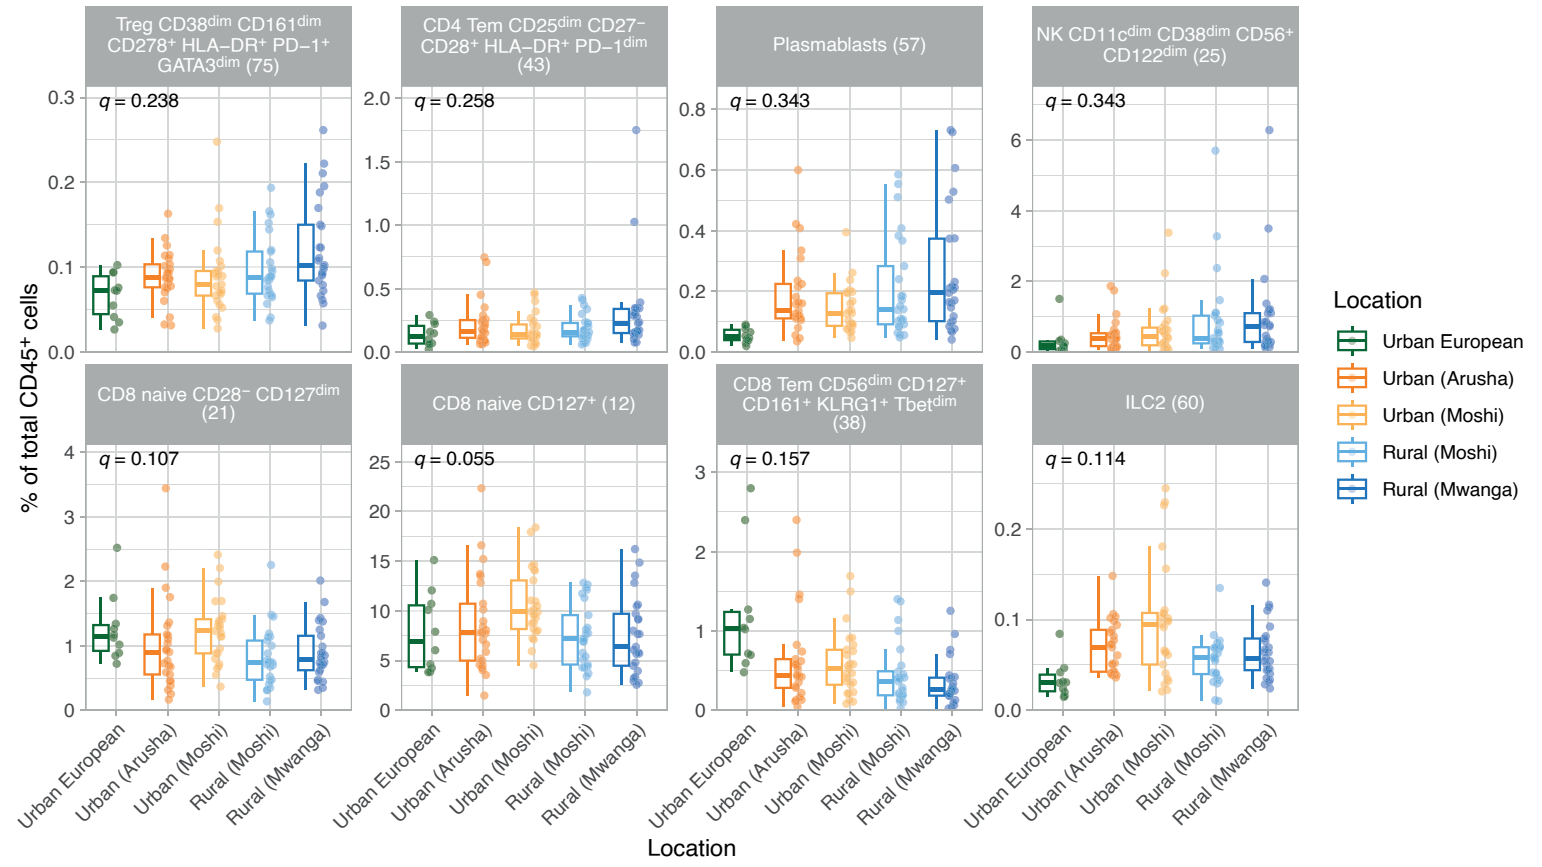

**Figure S6**

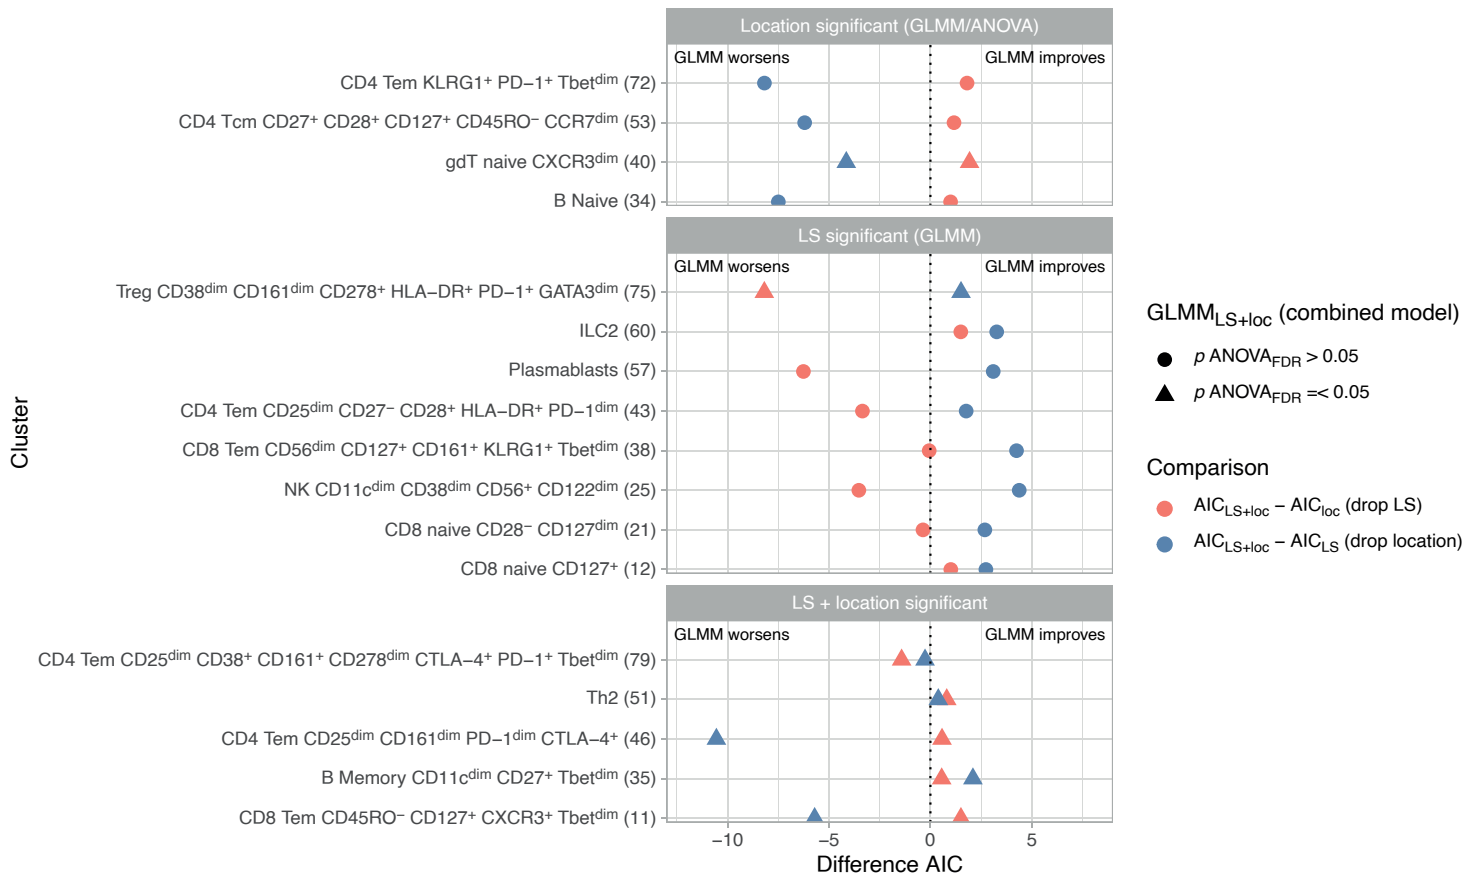

Supplement: mmc1.pdf [file mmc1.pdf]
